# A benchmark of structural variation detection by long reads through a realistic simulated model.

Nicolas Dierckxsens<sup>1,2\*</sup>, Tong Li<sup>1</sup>, Joris R. Vermeesch<sup>2</sup> and Zhi Xie<sup>1†</sup>

<sup>1</sup>State Key Laboratory of Ophthalmology, Zhongshan Ophthalmic Center, Sun Yat-sen University, Guangzhou, 510060, China, <sup>2</sup>Center for Human Genetics, University Hospital Leuven and KU Leuven, Leuven, Belgium

## 1 ABSTRACT

2 **Despite the rapid evolution of new sequencing**  
3 **technologies, structural variation detection remains**  
4 **poorly ascertained. The high discrepancy between the**  
5 **results of structural variant analysis programs makes**  
6 **it difficult to assess their performance on real datasets.**  
7 **Accurate simulations of structural variation distributions**  
8 **and sequencing data of the human genome are crucial**  
9 **for the development and benchmarking of new tools.**  
10 **In order to gain a better insight into the detection of**  
11 **structural variation with long sequencing reads, we**  
12 **created a realistic simulated model to thoroughly compare**  
13 **SV detection methods and the impact of the chosen**  
14 **sequencing technology and sequencing depth. To achieve**  
15 **this, we developed Sim-it, a straightforward tool for the**  
16 **simulation of both structural variation and long-read**  
17 **data. These simulations from Sim-it revealed the strengths**  
18 **and weaknesses for current available structural variation**  
19 **callers and long read sequencing platforms. Our findings**  
20 **were also supported by the latest structural variation**  
21 **benchmark set developed by the GIAB Consortium. With**  
22 **these findings, we developed a new method (combiSV)**  
23 **that can combine the results from five different SV callers**  
24 **into a superior call set with increased recall and precision.**  
25 **Both Sim-it and combiSV are open source and can be**  
26 **downloaded at <https://github.com/ndierckx/>.**  
27

## 28 INTRODUCTION

29 In order to decipher the genetic basis of human disease, a  
30 comprehensive knowledge of all genetic variation between  
31 human genomes is needed. Until recently, the emphasis has  
32 been on single-nucleotide polymorphisms, as these variants  
33 are easier to trace with current sequencing technologies and  
34 algorithms (1, 2). Over the past 20 years, we gained a better  
35 view on the prevalence of structural variation (SV), which  
36 changed our perspective on the impact it has on genomic  
37 disorders. We now know that structural variation contributes  
38 more to inter-individual genetic variation at the nucleotide  
39 level than single nucleotide polymorphisms (SNPs) and short  
40 indels together (3, 4). Structural variation covers insertions,  
41 deletions, inversions, duplications and translocations that are

42 at least 50 bp in size. The limited length of Next-Generation  
43 Sequencing (NGS) reads ( $\leq 300$  bp) hampers the detection  
44 of SVs, especially for insertions (3, 5). These technical  
45 limitations can be partially overcome by the third-generation  
46 sequencing, which is capable of producing far longer read  
47 lengths (6, 7). The race for dominance on the third-generation  
48 sequencing market has significantly reduced the costs per Mb  
49 and increased the throughput and accuracy, which makes these  
50 technologies (PacBio and Oxford Nanopore) currently the best  
51 option for structural variance detection (8).

52 The downside of these longer reads are their lower  
53 accuracies (85-95%) compared to NGS reads ( $> 99\%$ ), which  
54 requires new computational tools to achieve an optimal SV  
55 detection. Even though several algorithms were developed  
56 over the past decade, there is a large discrepancy between  
57 their outputs. Assessing the performance of SV detection  
58 tools is not straightforward, as there is no gold standard  
59 method to accurately identify structural variation in the human  
60 genome. To overcome this shortcoming, the Genome in a  
61 Bottle (GIAB) Consortium recently published a sequence-  
62 resolved benchmark set for identification of SVs, though it  
63 only includes deletions and insertions not located in segmental  
64 duplications (9). For as long as there is no completely resolved  
65 benchmark available, it is crucial to simulate a human genome  
66 with a set of structural variations that resembles reality as  
67 close as possible. There are a wide range of structural variation  
68 and long sequencing reads simulators available, yet without  
69 a thorough benchmark, it is impossible to know which tools  
70 are best suited to design the model you want to simulate.  
71 Therefore we compared several structural variance and long  
72 read simulators for their system requirements and available  
73 features. Furthermore we introduce Sim-it, a new SV and long  
74 read simulator that we designed for the assessment of SV  
75 detection with long read technologies.

76 The most complete structural variance detection study to  
77 date identified around 25,000 SVs for each individual by  
78 combining a wide range of sequencing platforms (3). The  
79 large amount of sequencing data used for this study makes it  
80 too costly to reproduce it on a larger scale, but it can be used  
81 as a golden standard for other SV studies. We used the results  
82 of this study to produce a realistic model for the evaluation of  
83 the available SV detection algorithms and to develop a new  
84 script that can improve SV detection by combining the results  
85 of existing tools.

\*To whom correspondence should be addressed. Email: nicolasdierckxsens@hotmail.com

†To whom correspondence should be addressed. Email: xiezhi@gmail.com

**Table 1** | Available features and system requirements of structural variation simulators.

|                                      | Sim-it   | SVEngine  | RSVSim  | Varsim   | SCNVsim |
|--------------------------------------|----------|-----------|---------|----------|---------|
| <b>INPUT</b>                         |          |           |         |          |         |
| INS, DEL, INV, DUP and TRA           | ✓        | ✓         | ✓       | ✓        | ✓       |
| Inverted duplications                | ✓        | ✓         |         | ✓        |         |
| Complex substitutions                | ✓        |           | ✓       | ✓        |         |
| Foreign sequence insertion           | ✓        | ✓         |         | ✓        |         |
| Random generated SVs                 | ✓        | ✓         | ✓       |          | ✓       |
| Realistic distribution of random SVs | ✓        |           | ✓       |          |         |
| Breakpoint at base pair resolution   | ✓        | ✓         | ✓       | ✓        |         |
| <b>OUTPUT</b>                        |          |           |         |          |         |
| Separate haplotypes                  | ✓        | ✓         |         | ✓        | ✓       |
| Short sequencing reads               |          | ✓         |         | ✓        |         |
| Long sequencing reads                | ✓        |           |         | ✓        |         |
| Graphical output                     | ✓        |           | ✓       |          |         |
| Phylogenetic clonal structure        |          | ✓         |         |          | ✓       |
| <b>COMPUTATIONAL RESOURCES</b>       |          |           |         |          |         |
| Wall time                            | 5 m 30 s | 12 m 04 s | 938 m   | 9 m 27 s | / (*)   |
| Virtual Memory                       | 1 GB     | 24.3 GB   | 11.9 GB | 8 GB     | / (*)   |

\*SCNVsim was excluded from the benchmark.

## RESULTS

**Structural variation simulation benchmark.** We compared the features and computational resources of five structural variation simulators, as shown in Table 1. Although all simulators can simulate the most common types of structural variation (insertions, deletions, duplications, inversions and translocations), more complex SV events need to be included in order to reproduce a realistic SV detection model. For Sim-it, we also included complex substitutions and inverted duplications, both common types of variation in germline and somatic genomes (5, 10, 11, 12). Additionally, it is possible to combine random generated SV events with a defined list of SVs at base pair resolution. Random generated SVs will be distributed realistically across the genome with higher prevalence around the telomeres. As output, Sim-it produces a sequence file in FASTA format and optionally long sequencing reads (PacBio or ONT). Although none of the other tools has a proprietary method to simulate long reads, Varsim can generate long reads through PBSIM or LongISLND. Currently, Sim-it does not support short read or phylogenetic clonal structure simulation. As for computational resources, Sim-it performed best on peak memory consumption and runtime. With 1 GB as peak memory consumption and 5 min 30 s as runtime (single core) to simulate 24,600 SV events, Sim-it can be implemented for any set of SVs on a small desktop or laptop. SVEngine and Varsim also have relatively low runtimes, though a peak memory consumption of respectively 24.3 GB and 8 GB limits its use on machines with limited computational resources. SCNVsim was excluded as it does not accept a set list of SVs as input and has an upper limit of 600 SVs for random simulation.

**Long read simulation benchmark.** We assessed the quality of the simulated long reads by comparing their error profiles to those of real PacBio and ONT sequencing reads. Additionally, we compared the features and system requirements for each tool.

Several systems of ONT and PacBio technologies have been released in the last decade, each with different specifications

for the sequencing reads. This complicates an accurate simulation as a specific error profile is needed for each released system. From the 8 tested simulators, only Sim-it, Badread and LongISLND support simulations for both ONT and PacBio. Sim-it provides error profiles for ONT, PacBio RS II, PacBio Sequel II and Pacbio Sequel HiFi systems, while other simulators are limited to one or two error profiles. This shortcoming can be overcome by training a new model for a system, a feature supported by all simulators apart from PBSIM and SimLoRD. This is more laborious and a real dataset along with an accurate reference sequence is required to train a new model. Not all updates require a completely new error profile, therefore we provide the option to adjust the overall accuracy and read length independently from the error profile. As for computational resources, PBSIM performed the best with just 5 minutes and 0.25 GB of RAM to simulate 15x coverage for chromosome 1 of GRCh38. Besides for DeepSimulator, Badread and NanoSim, computational resources stayed within a reasonable range.

Available features and computational resources determine the suitability and user-friendliness of the simulators, but not the accuracy of the simulation. Therefore, we compared the context-specific error patterns of the simulated reads to real long sequencing datasets. Figure 1A shows the context-specific errors derived from real data from Nanopore PromethION and PacBio Sequel II sequencing reads, as well from their respective simulations by Sim-it. These context-specific error heat-maps were generated for each of the 8 simulators and can be found in Supplementary materials. NanoSim generated random errors in stead of a context-specific error pattern, while PBSIM and SimLoRD have simplified patterns. For Sim-it, the length of deletions and insertions closely match the real data (Figure 1C and 1D). LongISLND has proportionally too many single nucleotide deletions, while the asymmetry for DeepSimulator is caused by a low absolute number of deletions, which is not adjustable.

**Structural variance detection using simulated long reads.** We assessed the performance of 6 long read SV detection algorithms through a realistic model of 24,600 SV events. Additionally, we made a comparison between PacBio and ONT technology and evaluated the impact of the read length and coverage depth. For each simulated dataset, a separate score for each type of SV and for the four essential parameters that define SVs; namely position, length, type and haplotype were calculated.

We performed a complete analysis on each of the 6 SV callers for a Nanopore and a PacBio Sequel II long reads and a HiFi reads dataset with a sequencing depth of 20x (Table 2). For each dataset, Picky had more than 19,000 false positives and false negatives, with an outlier of 46,502 false positives for the PacBio HiFi dataset. We therefore excluded Picky for any further analysis or graphical output. All the statistics of Picky for all three 20x coverage datasets can be examined in the Supplementary Data.

For a sequencing depth of 20x, Sniffles and pbsv achieved the best overall performance across all sequencing platforms. Sniffles produced the lowest number of false positives independent from sequencing platform and coverage depth (Table 2 and Figure 2). For PacBio HiFi data, Sniffles performs significantly worse than pbsv, which can be explained by

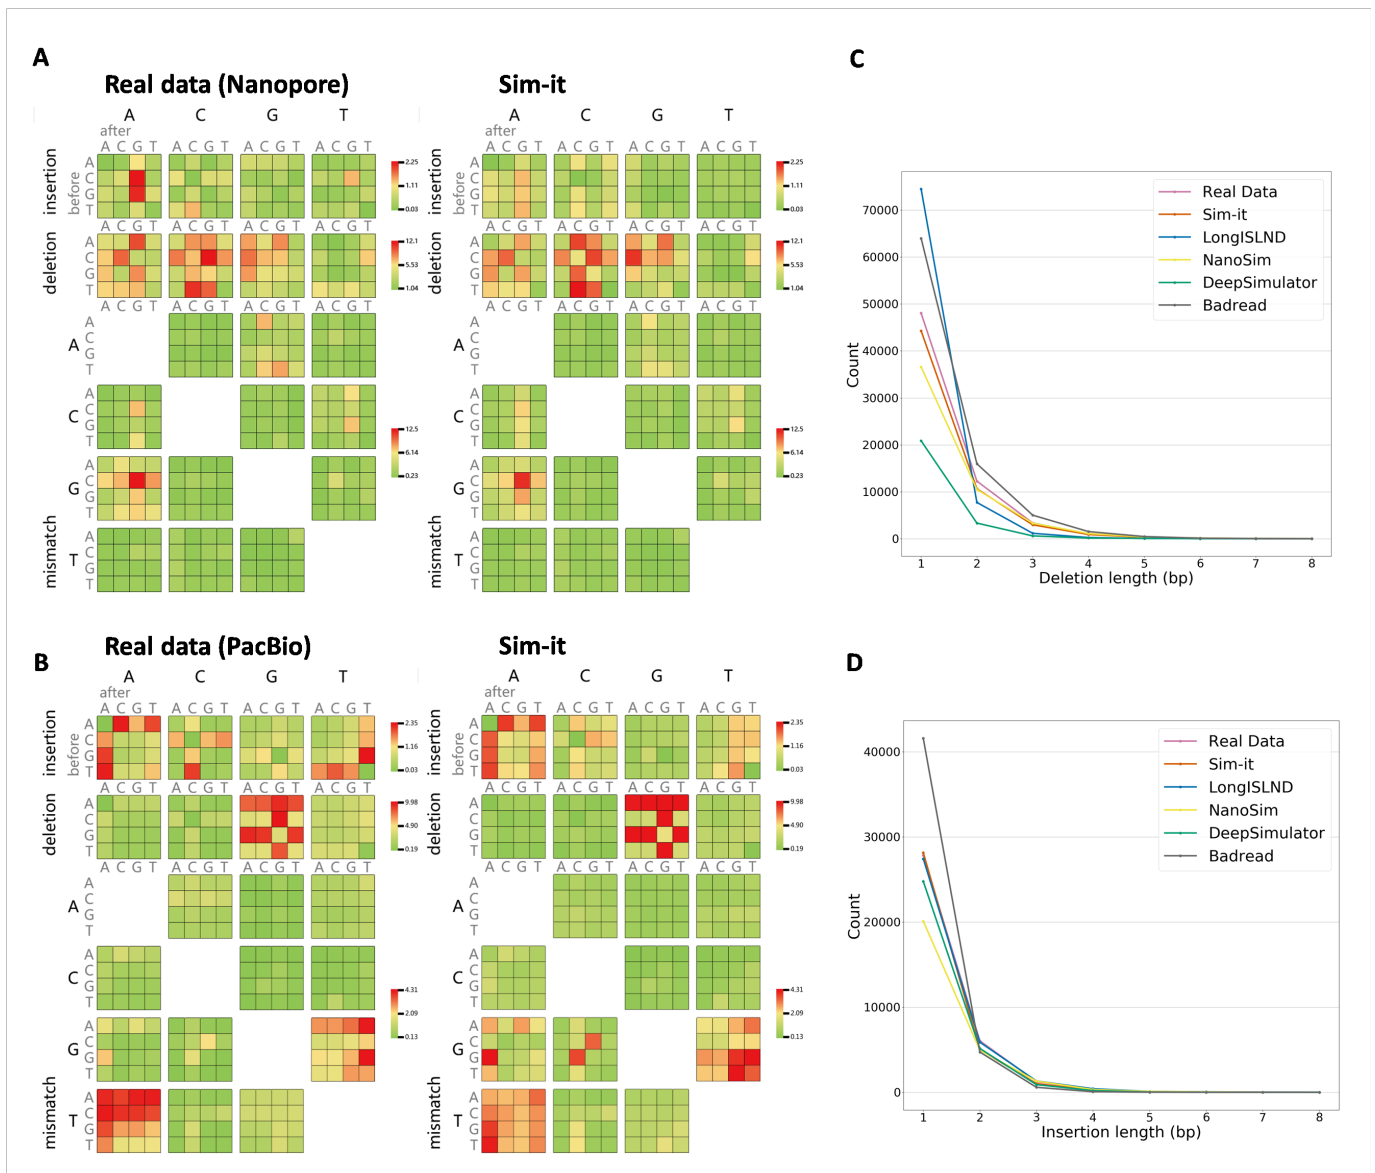

**Figure 1** | Context-specific error patterns for mismatches and indels. (A) Context-specific error patterns for real data of Nanopore (9.4.1) and simulated data from Sim-it. (B) Context-specific error patterns for real data of PacBio Sequel II and simulated data from Sim-it. (C) Deletion lengths for real Nanopore data and the simulations of the benchmarked tools. (D) Insertion lengths for real Nanopore data and the simulations of the benchmarked tools.

186 the shorter read lengths (Figure 3). Although pbsv generally 201  
 187 has a lower recall, it calls SVs more accurately (position, 202  
 188 length, type, haplotype) than any other tool, independent 203  
 189 from the platform or coverage depth. Subsequently, this high 204  
 190 accurateness results in a significant higher number of perfect 205  
 191 matches compared to other tools. Perfect matches are SVs 206  
 192 called with the correct type, haplotype, exact length and 207  
 193 position. For PacBio CLR and PacBio HiFi reads, pbsv 208  
 194 manages to call respectively 47% and 59.46% of the detected 209  
 195 SVs perfectly, which is quite impressive compared to the other 210  
 196 tools. Only SVIM achieved a similar percentage for PacBio 211  
 197 HiFi reads (57.49%), however not for PacBio CLR reads 212  
 198 (7.76%). The highest recall is achieved by NanoSV and to a 213  
 199 certain extent NanoVar (only for PacBio HiFi), however this 214  
 200 is at the expense of a disproportional amount of false positives. 215

The 24,600 SVs can be classified by 5 different types, namely deletions, insertions, duplications, inversions and complex substitutions. We calculated the recall and precision metrics for each type of SV; Table 3 shows the results for the Nanopore 20x dataset, data metrics for the PacBio 20x and PacBio HiFi 20x datasets reveal similar patterns and can be examined in the Supplementary Data. NanoSV only classifies insertions, other SVs are indicated as breakend (BND). None of the SV callers classify complex substitutions in their output, which explains the missing precision values for this type. These complex substitutions seem to be the most problematic, as their recall values are very low for each of the tools. Recall and precision values of inversions are also far below the average for each of the tools. The low precision value for duplications detected by NanoVar can be explained by the

4

**Table 2** | Benchmark statistics on three simulated datasets of 24,600 SVs for 5 existing SV callers and combiSV (combiSV (3): pbsv, Sniffles and SVIM combined; combiSV (5): all 5 tools combined).

|                        |                    | Sniffles     | pbsv         | NanoVar      | NanoSV       | SVIM         | combiSV (3)  | combiSV (5)  |
|------------------------|--------------------|--------------|--------------|--------------|--------------|--------------|--------------|--------------|
| <b>Nanopore</b>        | Recall             | 79.89%       | 73.19%       | 80.34%       | 83.19%       | 80.95%       | 81.24%       | 81.11%       |
|                        | Precision          | 96.93%       | 94.61%       | 86.06%       | 87.56%       | 91.90%       | 97.10%       | 97.72%       |
|                        | Perfect matches    | 11.62%       | 34.94%       | 1.58%        | 0.52%        | 6.32%        | 31.84%       | 31.88%       |
|                        | Position score     | 87.6%        | 90.6%        | 78.6%        | 88.7%        | 82.2%        | 90.7%        | 90.5%        |
|                        | Length score       | 90.9%        | 95.2%        | 83.4%        | 90.3%        | 90.4%        | 95.5%        | 95.3%        |
|                        | Type score         | 93.6%        | 94.8%        | 87.7%        | 45.6%        | 94.8%        | 93.7%        | 94.4%        |
|                        | Haplotype score    | 58.4%        | 94.6%        | 88.6%        | 94.9%        | 93.0%        | 94.8%        | 94.7%        |
|                        | <b>Total score</b> | <b>64.3%</b> | <b>64.0%</b> | <b>54.0%</b> | <b>56.1%</b> | <b>64.5%</b> | <b>73.4%</b> | <b>73.6%</b> |
| <b>PacBio</b>          | Recall             | 78.66%       | 73.69%       | 80.51%       | 83.30%       | 80.99%       | 80.27%       | 80.81%       |
|                        | Precision          | 97.45%       | 94.53%       | 85.95%       | 88.17%       | 92.48%       | 97.70%       | 98.19%       |
|                        | Perfect matches    | 12.82%       | 47.00%       | 2.24%        | 4.30%        | 7.76%        | 43.37%       | 42.99%       |
|                        | Position score     | 87.4%        | 91.6%        | 79.1%        | 88.3%        | 82.7%        | 91.6%        | 91.6%        |
|                        | Length score       | 93.0%        | 96.5%        | 79.9%        | 93.4%        | 92.5%        | 96.7%        | 96.7%        |
|                        | Type score         | 95.2%        | 94.7%        | 87.4%        | 46.0%        | 95.1%        | 95.2%        | 95.2%        |
|                        | Haplotype score    | 58.5%        | 94.7%        | 88.2%        | 95.1%        | 92.8%        | 94.4%        | 94.4%        |
|                        | <b>Total score</b> | <b>64.2%</b> | <b>64.9%</b> | <b>53.5%</b> | <b>57.3%</b> | <b>65.6%</b> | <b>73.6%</b> | <b>73.6%</b> |
| <b>PacBio HiFi</b>     | Recall             | 70.90%       | 73.04%       | 82.19%       | 80.27%       | 76.83%       | 76.71%       | 77.11%       |
|                        | Precision          | 97.88%       | 96.16%       | 86.04%       | 94.84%       | 95.81%       | 97.70%       | 98.10%       |
|                        | Perfect matches    | 26.12%       | 59.46%       | 12.90%       | 29.68%       | 57.49%       | 57.26%       | 57.21%       |
|                        | Position score     | 93.0%        | 93.1%        | 86.3%        | 92.9%        | 92.6%        | 93.1%        | 93.0%        |
|                        | Length score       | 97.7%        | 97.1%        | 88.8%        | 96.2%        | 97.0%        | 97.8%        | 97.7%        |
|                        | Type score         | 94.9%        | 94.6%        | 88.9%        | 43.3%        | 94.6%        | 94.9%        | 94.8%        |
|                        | Haplotype score    | 47.2%        | 93.2%        | 91.5%        | 96.6%        | 95.0%        | 91.4%        | 93.5%        |
|                        | <b>Total score</b> | <b>58.8%</b> | <b>65.9%</b> | <b>59.3%</b> | <b>63.4%</b> | <b>69.1%</b> | <b>70.4%</b> | <b>71.3%</b> |
| <b>GIAB (Nanopore)</b> | Recall             | 91.21%       | 87.16%       | 89.28%       | 93.96%       | 92.78%       | 93.73%       | 93.60%       |
|                        | Precision          | 91.72%       | 89.89%       | 66.51%       | 55.82%       | 84.10%       | 92.44%       | 91.98%       |
|                        | Perfect matches    | 0.09%        | 28.16%       | 0.68%        | 0.53%        | 2.36%        | 26.16%       | 25.90%       |
|                        | Position score     | 67.7%        | 75.6%        | 61.3%        | 73.0%        | 62.4%        | 73.7%        | 73.6%        |
|                        | Length score       | 80.4%        | 87.0%        | 62.3%        | 77.4%        | 79.8%        | 86.2%        | 86.3%        |
|                        | Type score         | 94.7%        | 97.5%        | 61.0%        | 48.0%        | 95.0%        | 97.1%        | 97.3%        |
|                        | Haplotype score    | 37.5%        | 90.0%        | 66.0%        | 87.1%        | 85.0%        | 89.1%        | 87.6%        |
|                        | <b>Total score</b> | <b>55.3%</b> | <b>64.4%</b> | <b>10.7%</b> | <b>0.0%</b>  | <b>53.8%</b> | <b>71.1%</b> | <b>70.2%</b> |

**Table 3** | Precision and recall statistics for each type of SV from the Nanopore 20x dataset. (combiSV (3): pbsv, Sniffles and SVIM combined; combiSV (5): all 5 tools combined)

|                  |                       | Sniffles | pbsv  | NanoVar | NanoSV | SVIM  | combiSV (3) | combiSV (5) |
|------------------|-----------------------|----------|-------|---------|--------|-------|-------------|-------------|
| <b>Precision</b> | Deletions             | 92.1%    | 96.5% | 87.1%   | -      | 93.3% | 91.4%       | 94.2%       |
|                  | Insertions            | 90.6%    | 89.1% | 81.5%   | 85.9%  | 84.8% | 91.5%       | 91.2%       |
|                  | Duplications          | 66.3%    | 50.7% | 13.1%   | -      | 65.4% | 63.7%       | 68.1%       |
|                  | Inversions            | 50.9%    | 71.9% | 59.9%   | -      | 74.1% | 69.3%       | 56.7%       |
|                  | Complex substitutions | -        | -     | -       | -      | -     | -           | -           |
| <b>Recall</b>    | Deletions             | 92.0%    | 92.3% | 92.7%   | 95.2%  | 95.7% | 95.2%       | 94.8%       |
|                  | Insertions            | 87.4%    | 75.0% | 89.9%   | 89.8%  | 89.0% | 87.7%       | 89.1%       |
|                  | Duplications          | 89.5%    | 88.2% | 93.6%   | 94.6%  | 94.9% | 91.4%       | 92.5%       |
|                  | Inversions            | 64.1%    | 51.8% | 58.8%   | 62.4%  | 47.6% | 49.4%       | 58.2%       |
|                  | Complex substitutions | 13.0%    | 1.4%  | 5.2%    | 19.4%  | 3.3%  | 12.7%       | 7.0%        |

216 fact that a significant fraction of the insertions are typed as a 222  
 217 duplication. 223

218 To investigate the influence of increased sequencing 224  
 219 coverage, we simulated 4 different datasets with sequencing 225  
 220 depths of 10x, 20x, 30x and 50x for both Nanopore and PacBio 226  
 221 HiFi (Figure 2). The general trends for increased sequencing 227

depth are an increased recall and increased false positives, although depending on the tool, they can be disproportional to each other. NanoVar was designed to work on low sequencing depths and therefore does not display much gains in recall, yet a significant reduction in precision. Sniffles benefits the most from additional coverage with steep increases of recall



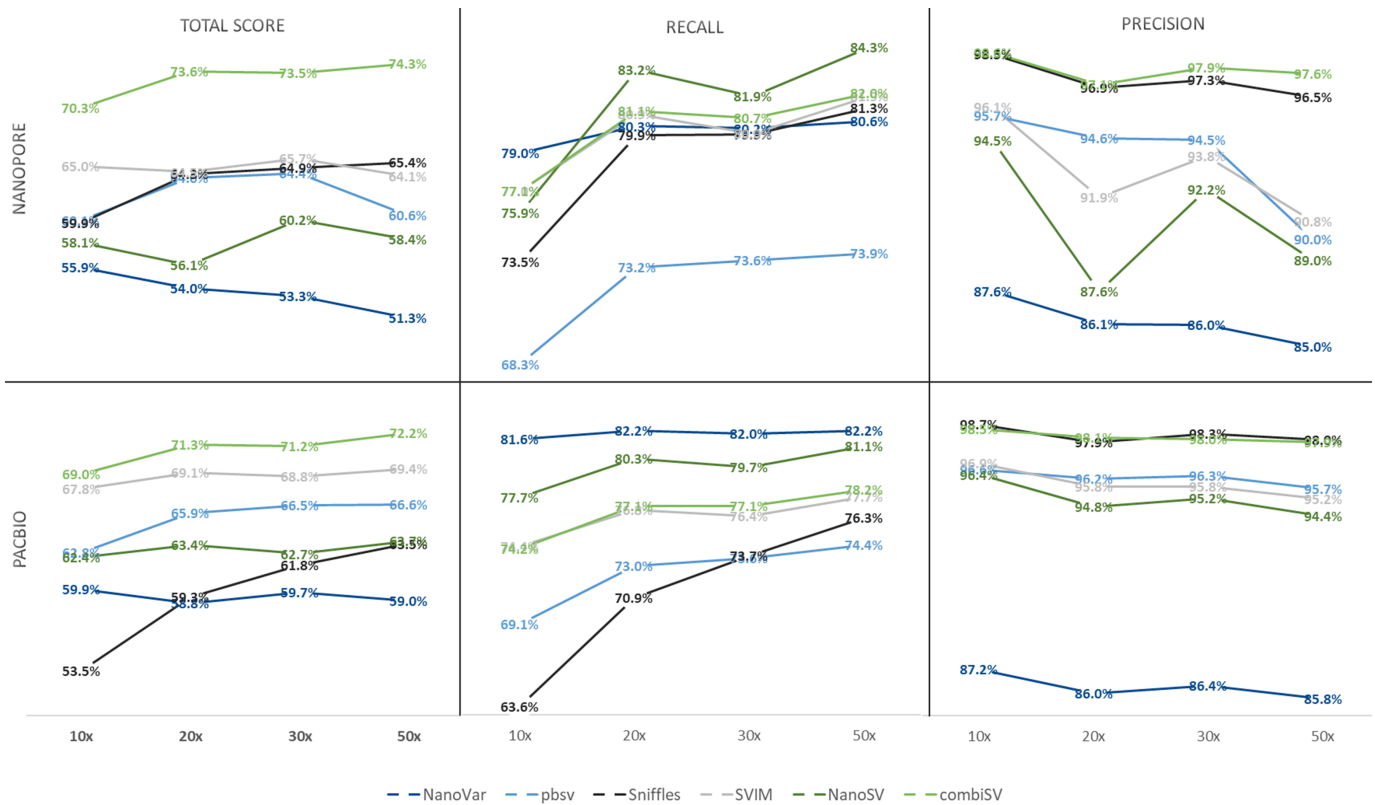

**Figure 2** | Structural variance detection stats for a series of Nanopore and PacBio HiFi datasets with increasing sequencing depths.

228 together with a relatively low loss of precision. pbsv has a 257  
 229 stable performance across all coverages, with the exception 258  
 230 of Nanopore 50x, which exhibits a steep increase in false 259  
 231 positives. The big drops in precision for NanoSV and SVIM 260  
 232 at 20x and 50x coverage of Nanopore are caused by the 261  
 233 additional filtering step we implemented for minimal variance 262  
 234 allele coverage (3 for 10x and 20x, 5 for 30x and 50x). This 263  
 235 shows how important the choice for the minimal coverage 264  
 236 threshold is to obtain a good balance between recall and 265  
 237 precision. 266

238 Besides sequencing depth, it is often believed that 267  
 239 increasing sequencing lengths can improve assemblies and 268  
 240 variance detection. We compared the SV detection metrics 269  
 241 for three datasets of Nanopore with median read lengths 270  
 242 of 15,000, 25,000 and 40,000 bp. We observed an increase 271  
 243 in recall and overall score with increasing read lengths for 272  
 244 each of the tools, with the most pronounced improvement 273  
 245 from median lengths of 15k to 25k. NanoVar and pbsv 274  
 246 show a modest rise in recall of 1% between 15k and 40k 275  
 247 lengths, while Sniffles, SVIM, NanoSV and combiSV show an 276  
 248 increase of 6%. All metrics of this comparison can be found 277  
 249 in the Supplementary Data. 278

250  
 251 **Structural variance detection using real datasets.** There 280  
 252 is currently no SV call set covering the complete human 281  
 253 genome that can be used as gold standard in a SV detection 282  
 254 benchmark. The GIAB Consortium provides an accurate SV 283  
 255 call-set of 5,260 insertions and 4,138 deletions, covering 2.5 284  
 256 GB of the human genome. Within the regions of the provided 285

257 BED file, it is possible to accurately determine the recall and  
 258 precision for both deletions and insertions. We benchmarked  
 259 each of the tools for this high confidence set of SVs. We  
 260 observed a similar pattern in benchmark metrics compared to  
 261 the simulated dataset, with the exception of the low precision  
 262 values for NanoVar and NanoSV. Recall values for the GIAB  
 263 dataset are across all tools higher than for the simulated  
 264 datasets, which can be explained by the exclusion of complex  
 265 regions in the GIAB call set. The benchmark metrics of this  
 266 real dataset also confirms our findings from the simulated  
 267 datasets, though sometimes more outspoken in the real dataset.  
 268 Sniffles has the highest precision, pbsv characterizes SVs the  
 269 most accurate, NanoSV has the highest recall, low haplotype  
 270 scores for sniffles and low position scores for SVIM are all  
 271 findings that were observed with both simulated and real  
 272 datasets.

273 We based our simulated datasets on a SV call set  
 274 of NA19240 (nstd152), which was obtained through an  
 275 elaborated SV study that combined a wide range of  
 276 sequencing data (3). To compare our simulation to the  
 277 original genome, we performed the same benchmark on a  
 278 public available PacBio CLR dataset of that study. Recall  
 279 and precision values of the real dataset were significantly  
 280 lower, with an average of respectively 60% and 48%. An  
 281 even more striking difference were the recall percentages of  
 282 around 60% for complex substitutions, while these values  
 283 ranged between 1% and 20% for the simulated datasets,  
 284 independent from sequencing platform or sequencing depth.  
 285 While the overall lower recall and precision values were to

286 be expected due to inaccuracies of the SV call set, we found 345  
287 the large rise in recall for complex substitutions questionable. 346  
288 We therefore examined several alignments of SVs that were 347  
289 typed as complex substitutions. We found that most of these 348  
290 complex substitutions are actually insertions or deletions, 349  
291 which would explain the high recall values. Most of the 350  
292 complex substitutions in nstd152 were determined by merging 351  
293 of experiments (optical mapping, sequence alignment and de 352  
294 novo assembly) and not associated to just one method. It 353  
295 is possible that conflicting findings between methods were 354  
296 thought to be caused by complex substitutions as they consist 355  
297 of both a deletion and an insertion. We added some concrete 356  
298 examples with screenshots of alignments and BLAST results 357  
299 of individual reads in the Supplementary Data as evidence of 358  
300 these findings. 359

301  
302 **Improved SV calling with combiSV.** This benchmark 361  
303 revealed the strengths and weaknesses of each SV calling 362  
304 tool for long read sequencing. With this performance data we 363  
305 were able to develop a tool (combiSV) that can combine the 364  
306 outputs of pbsv, Sniffles, NanoVar, NanoSV and SVIM into 365  
307 a superior SV call set, with Sniffles and pbsv as mandatory 366  
308 input. The VCF outputs of each tool serve as input and the 367  
309 minimal of supported reads for the variance allele has to be 368  
310 given. The complete wall time is under 1 minute and less 369  
311 than 1 GB of virtual memory is required. By combining the 370  
312 strengths of each of the 5 SV callers, we were able to eliminate 371  
313 distinct weaknesses and improve overall performance (Table 372  
314 2). The most significant improvements were the ratio of total 373  
315 matches versus false positives and the accurate definition of 374  
316 the SV parameters. The added value of combiSV can also 375  
317 be seen by the sequence depth analysis (Figure 2), where 376  
318 combiSV has consistently the best overall performance and 377  
319 does not show any significant drops in recall or precision 378  
320 for any of the sequencing depths. The improved performance 379  
321 of combiSV is less pronounced by the precision and recall 380  
322 values of the individual SV types, which can be explained 381  
323 by the fact that the performance gain was mostly limited 382  
324 for deletions and insertions. Most importantly, combiSV also 383  
325 showed significant improvement for the real GIAB dataset, 384  
326 as it combines the highest recall from NanoSV, the highest 385  
327 precision from Sniffles and the accuracy from pbsv. This high 386  
328 recall is also achieved without NanoSV, as combiSV(3) only 387  
329 combines pbsv, sniffles and SVIM. The combination of all 388  
330 5 callers reduced the recall and precision slightly, which is 389  
331 probably caused by the high number of false positives of 390  
332 NanoSV and NanoVar. Therefore it is not necessary to include 391  
333 the output of all 5 SV callers to run combiSV, although it is 392  
334 advised to add one additional caller besides pbsv and Sniffles. 393

## 335 DISCUSSION

336 We developed a realistic simulated model to benchmark 397  
337 existing structural variation detection tools for long read 398  
338 sequencing. This was accomplished with Sim-it, a newly 399  
339 developed tool for the simulation of structural variation 400  
340 and long sequencing reads. Although there are several 401  
341 tools available that can simulate structural variation or long 402  
342 sequencing reads, a benchmark study to assess the accuracy of 403  
343 these simulators was needed. Besides Sim-it, the combination 404  
344 of Varsim and LongISLND (despite the aberration for the 405

length of deletions) could also have been used for this benchmark study. We simulated in total 5 PacBio and 7 Nanopore whole genome sequencing datasets of GRCh38 with coverages ranging between 10x and 50x. With these simulations, we assessed the performance of 6 SV callers and the influence of increasing sequencing depths and read lengths.

For the majority of the datasets, Sniffles, pbsv and SVIM produced the best overall performance with a good balance between recall and precision. Sniffles has the lowest number of false positives for all datasets, yet performs significantly less for PacBio HiFi datasets with a coverage below 30x. pbsv defines the SVs the most accurate across all datasets and since it is designed for PacBio, it performs the best on this type data. NanoSV and NanoVar have high recall numbers, however at the cost of a disproportional high false positive rate (to a lesser extent for PacBio HiFi data). These findings were supported by our benchmark on the high fidelity SV call set of GIAB.

It is often assumed that higher sequencing depths and longer read lengths will improve assembly and variance calling outcomes. Yet in our benchmark, increasing sequencing depths does not guarantee improved structural variation calling. Although there was still a modest rise in recall numbers for sequencing depths above 30x, we did observe a disproportional rise in false positives above 30x. This rise in false positives was not observed for increasing sequencing lengths, while we observed an increase in recall for longer read lengths across all methods.

Finally, we looked at precision and recall rates for each type of SV. Each tool showed the best performance for deletions and insertions, which are the majority of SVs in a human genome. More problematic SVs are inversions and complex substitutions, wherefore recall rates are respectively between 45-65% and 1-20%. As complex substitutions are not defined by any of the tools, it seems likely that these algorithms are not designed to detect this type of SV. New SV callers or updates of existing ones could make significant improvements in this direction. Although the SV study we used as blueprint (3) detected around 3000 complex substitutions per individual, we discovered that most of these complex substitutions were insertions or deletions. The actual prevalence of this type of structural variation is therefore possibly not accurate and requires further studies in order to map the complete structural variation profile in the human genome.

This extensive benchmark unveiled the strengths and weaknesses of each SV detection algorithm and provided the blueprint for the integration of multiple algorithms in a new SV detection pipeline, namely combiSV. This Perl script can combine the VCF outputs from Sniffles, pbsv, NanoVar, NanoSV and SVIM into a superior call set that has the low false positive rate of Sniffles, the accuracy of pbsv and a high recall as SVIM. The added value of combiSV on simulated data was supported by the real dataset of GIAB, where the gains were even more outspoken.

This study shows that a simulated model can be beneficial to gain a better understanding in the performance of structural variation detection tools. It is crucial that the simulations are as accurate as possible. Currently, Sim-it does not simulate small indels and SNPs, although they can have an effect on the detection of small SVs and will therefore be included in the next update. The sequencing depth of real sequencing datasets

406 show much more fluctuations than a simulated one, we 465  
407 therefore propose to include a profile of the sequencing depth 466  
408 in a real dataset that can be reproduced for the simulation. 467

time, we trained the error profile of PacBio Sequel II HiFi  
reads based on chromosome 1 of GRCh38. The Nanopore  
error profile is based on sequencing reads of a human sample  
on PromethION 9.4.1 flow cells.

## 409 METHODS 469

410 **Sim-it.** We developed a new structural variation and long read 471  
411 sequencing simulator, called Sim-it. The structural variation 472  
412 module outputs fasta files of each haplotype, plus an additional 473  
413 one that combines all SVs in one sequence. A set list of SVs 474  
414 can be combined with additional random generated SVs as 475  
415 input. The long read sequencing module outputs sequencing 476  
416 reads based on a given error profile and 4 metrics (coverage, 477  
417 median length, length range and accuracy). We provide error 478  
418 profiles for Nanopore, PacBio RS II, Sequel II and Sequel 479  
419 HiFi reads. Additional error profiles can be generated with 480  
420 a custom script. Both simulation modules (SV and long 481  
421 reads) can be used separately or simultaneously, starting 482  
422 from a sequence file as input. We also provide plots with 483  
423 the length distributions for the simulated sequencing reads 484  
424 and structural variations (insertions, deletions and inversions). 485  
425 Sim-it was written in Perl and does not require any further 486  
426 dependencies. Sim-it is open source and can be downloaded 487  
427 at <https://github.com/ndierckx/Sim-it>, where a more complete 488  
428 manual can be found. 489

**SV detection on simulated reads.** We used the simulated  
data from Sim-it to validate 6 structural variant callers, namely  
Sniffles (v1.0.11) (1), SVIM (v1.3.1) (23), NanoSV (v1.2.4)  
(24), Picky (v0.2.a) (25), NanoVar (v1.3.8) (26) and pbsv  
(v2.3.0). A list of 24,600 SVs, derived from sample NA19240  
of dbVAR nstd152 (3), was used to simulate Nanopore,  
PacBio CLR reads and PacBio HiFi reads for GRCh38 at  
a sequencing depth of 20x. We also simulated 20x normal  
read using GRCh38 with not structural variants at all. Besides  
for pbsv, we aligned the simulated reads to GRCh38 using  
Minimap2 (v2.17-r941) (27). The alignment for pbsv was  
performed using pbmm2 (v1.3.0) with default parameters. The  
exact parameters that were used for the alignments and SV  
callers can be found in the Supplementary Data.

429 **Benchmark of structural variation simulators.** We 491  
430 compared Sim-it (v1.0) with RSVSim (v1.24.0) (13), 492  
431 SVEngine (v1.0.0) (14), SCNVSIM (v1.3.1) (10) and VarSim 493  
432 (v0.8.4) (11) for computing resource consumption and 494  
433 available features. Runtime performance was measured using 495  
434 the Unix time command and Snakemake (v5.7.0) (15) 496  
435 benchmark function on the custom VCF of 24,600 SVs. We 497  
436 did not evaluate SCNVSIM performance because it does not 498  
437 accept a custom VCF file. All scripts were executed on a Xeon 499  
438 E7-4820 with 512GB of memory. 500

Furthermore, we simulated additional Nanopore and  
PacBio HiFi reads for GRCh38 at sequencing depths of 10x,  
30x and 50x to study the influence of increasing sequencing  
depths for SV calling. Each of the Nanopore simulations had  
a median read length of 25,000 bp, we also included two  
additional simulations of 15,000 bp and 40,000 bp with a  
sequencing depth of 20x. PacBio long reads have a median  
length of 25,000 bp and the PacBio HiFi reads a median length  
of 15,000 bp. An additional filtering step was added for each  
VCF output; we only retained variances that obtained a PASS  
for the FILTER value, that have a length of 50 bp or more  
and wherefore at least 3 (for sequencing depths 10x and 20x)  
or 5 (for sequencing depths 30x and 50x) reads support the  
variance. This additional filtering step significantly improved  
the output for each tool compared to the raw VCF output.

440 **Benchmark of the long read simulators.** We compared 502  
441 Sim-it (v1.0) with the long read simulators PBSIM (v1.0.4) 503  
442 (16), Badread (v0.1.5) (17), PaSS (18), LongISLND (v0.9.5) 504  
443 (19), DeepSimulator (v1.5) (20), Simlord (v1.0.3) (21) and 505  
444 NanoSim (v2.6.0) (22) for computing resource consumption 506  
445 and error frequency within context-specific patterns for 507  
446 mismatches and indels using real data of Nanopore and PacBio 508  
447 sequencing. Runtime performance was measured using the 509  
448 Unix time command and Snakemake (v5.7.0) benchmark 510  
449 function on the 15x sequencing coverage simulation with 511  
450 chromosome 1 of GRCh38. Context-specific error patterns 512  
451 were analyzed by a custom perl script with alignment 30x 513  
452 simulated read to 60 Kbp sequence. All scripts were executed 514  
453 on a Xeon E7-4820 with 512GB of memory. More details on 515  
454 the error profiles used for each simulation can be found in the 516  
455 Supplementary Data. 517

Benchmark metrics were calculated by comparing the VCF  
output of each SV caller against the simulated reference set  
of 24,600 SVs. For each detected SV, we looked for possible  
matches in the reference set within a 500 bp range of the  
detected position. When the length of the SV was determined,  
we tolerated an error margin of 30%. If these two conditions  
were met, a detected SV was matched to the SV of the  
reference set, independent from the type or haplotype that  
was called. As there are multiple metrics that define the  
performance of an SV detection algorithm, we adopted an  
overall score that that combines each of the metrics. For each  
detected SV, a maximal score of 1 was possible; 0.4 for the  
correct position, 0.2 for the correct length, 0.2 for the correct  
type of SV and 0.2 for the correct haplotype. The scores for  
length and position proportionally decreased with difference  
compared to the reference set. Finally, the number of false  
positives were subtracted from the total score and eventually  
expressed as a percentage of the maximum possible score  
(Table 2).

456 **Train customized error profiles for Sim-it.** The E. coli 519  
457 K12 substrain MG1655 dataset of PacBio Sequel II and 520  
458 PacBio RS II was downloaded from the github website of 521  
459 Pacific Biosciences. Using the above two datasets we trained 522  
460 the error profile of PacBio Sequel II and PacBio RS II. We 523  
461 also downloaded the GIAB HG002 dataset of PacBio Sequel 524  
462 II HiFi reads powered by CCS. To reduce the computational 525

**SV detection on real datasets.** The Genome in a Bottle  
(GIAB) Consortium recently developed a high-quality SV call  
set for the son (HG002/NA24385) of a broadly consented and  
available Ashkenazi Jewish trio from the Personal Genome  
Project. We performed a benchmark on the latest most  
conserved BED file (HG002.SVs\_Tier1\_v0.6.2.bed) for this  
sample, which contains 5,260 insertions and 4,138 deletions.



The public available ultralong Nanopore reads (GM24385) with an average sequencing depth of 45x were used for this benchmark. Furthermore, we compared SV detection metrics of a public available PacBio dataset of NA19240 (3) with an average sequencing depth of 37x against the results of our simulated datasets.

**combiSV.** With the results of the SV detection benchmark, we developed a script to combine the results of pbsv, Sniffles, NanoVar, NanoSV and SVIM. The output VCF files of each of the 5 tools serve as input, from which the files of pbsv and Sniffles are obligatory to run combiSV. The minimal coverage of the alternative allele is set to 3 as default value, but can be adjusted for datasets with high sequencing depths. The script was written in Perl and does not require any further dependencies. combiSV is open source and can be downloaded at <https://github.com/ndierckx/combiSV>.

## REFERENCES

- Sedlazeck, F.J., Rescheneder, P., Smolka, M., Fang, H., Nattestad, M., von Haeseler, A. and Schatz, M.C. (2018). Accurate detection of complex structural variations using single-molecule sequencing. *Nature methods*, **15**(6):461–468. doi.org/10.1038/s41592-018-0001-7
- Escaramis, G., Docampo, E. and Rabionet, R. (2015). A decade of structural variants: description, history and methods to detect structural variation. *Brief Funct Genomics*, **14**(5):305–314. doi:10.1093/bfpg/elv014
- Chaisson, M.J.P., et al. (2019). Multi-platform discovery of haplotype-resolved structural variation in human genomes. *Nature Communications*, **10**, 1784. doi.org/10.1038/s41467-018-08148-z
- Sudmant, P.H., et al. (2015). An integrated map of structural variation in 2,504 Human genomes. *Nature*, **1**, 526(7571):75–81. doi: 10.1038/nature15394
- Chen, S., Krusche, P., Dolzhenko, E., Sherman, R. M., Petrovski, R., Schlesinger, F., Kirsche, M., Bentley, D. R., Schatz, M. C., Sedlazeck, F. J. and Eberle, M. A. (2019). Paragraph: a graph-based structural variant genotyper for short-read sequence data. *Genome biology*, **20**(1), 291. doi.org/10.1186/s13059-019-1909-7
- Wenger, A. M., et al. (2019). Accurate circular consensus long-read sequencing improves variant detection and assembly of a human genome. *Nature biotechnology*, **37**(10), 1155–1162. doi.org/10.1038/s41587-019-0217-9
- Jain, M., et al. (2018). Nanopore sequencing and assembly of a human genome with ultra-long reads. *Nature biotechnology*, **36**(4), 338–345. doi.org/10.1038/nbt.4060
- Audano, P. A., Sulovari, A., Graves-Lindsay, T. A., Cantsilieris, S., Sorensen, M., Welch, A. E., Dougherty, M. L., Nelson, B. J., Shah, A., Dutcher, S. K., Warren, W. C., Magrini, V., McGrath, S. D., Li, Y. I., Wilson, R. K. and Eichler, E. E. (2019). Characterizing the Major Structural Variant Alleles of the Human Genome. *Cell*, **176**(3), 663–675.e19. doi.org/10.1016/j.cell.2018.12.019
- Zook, J. M., et al. (2020). A robust benchmark for detection of germline large deletions and insertions. *Nature biotechnology*, **10**, 1038/s41587-020-0538-8. Advance online publication. doi.org/10.1038/s41587-020-0538-8
- Qin, M., Liu, B., Conroy, J. M., Morrison, C. D., Hu, Q., Cheng, Y., Murakami, M., Odunsi, A. O., Johnson, C. S., Wei, L., Liu, S. and Wang, J. (2015). SCNVSim: somatic copy number variation and structure variation simulator. *BMC bioinformatics*, **16**(1), 66. doi.org/10.1186/s12859-015-0502-7
- Mu, J. C., Mohiyuddin, M., Li, J., Bani Asadi, N., Gerstein, M. B., Abyzov, A., Wong, W. H. and Lam, H. Y. (2015). VarSim: a high-fidelity simulation and validation framework for high-throughput genome sequencing with cancer applications. *Bioinformatics*, **31**(9), 1469–1471. doi.org/10.1093/bioinformatics/btu828
- Hermetz, K.E., Newman, S., Conneely, K.N., Martin, C.L., Ballif, B.C., Shaffer, L.G., Cody, J. D., and Rudd, M.K. (2014). Large inverted duplications in the human genome form via a fold-back mechanism. *PLoS genetics*, **10**(1), e1004139. doi.org/10.1371/journal.pgen.1004139
- Bartenhagen, C. and Dugas, M. (2013). RSVSim: an R/Bioconductor package for the simulation of structural variations. *Bioinformatics*, **29**(13), 1679–1681. doi.org/10.1093/bioinformatics/btt198

- Xia, L. C., Ai, D., Lee, H., Andor, N., Li, C., Zhang, N. R. and Ji, H. P. (2018). SVEngine: an efficient and versatile simulator of genome structural variations with features of cancer clonal evolution. *GigaScience*, **7**(7), giy081. doi.org/10.1093/gigascience/giy081
- Köster, J. and Rahmann, S. (2018). Snakemake—a scalable bioinformatics workflow engine. *Bioinformatics*, **34**(20), 3600. doi.org/10.1093/bioinformatics/bty350
- Ono, Y., Asai, K. and Hamada, M. (2013). PBSIM: PacBio reads simulator—toward accurate genome assembly. *Bioinformatics*, **29**(1), 119–121. doi.org/10.1093/bioinformatics/bts649
- Wick, R. W. (2019). Badread: simulation of error-prone long reads. *Journal of Open Source Software*, **4**(36), 1316. doi.org/10.21105/joss.01316
- Zhang, W., Jia, B. and Wei, C. (2019). PaSS: a sequencing simulator for PacBio sequencing. *BMC bioinformatics*, **20**(1), 352. doi.org/10.1186/s12859-019-2901-7
- Lau, B., Mohiyuddin, M., Mu, J. C., Fang, L. T., Bani Asadi, N., Dallett, C. and Lam, H. Y. (2016). LongISLND: in silico sequencing of length and noisy datatypes. *Bioinformatics*, **32**(24), 3829–3832. doi.org/10.1093/bioinformatics/btw602
- Li, Y., Han, R., Bi, C., Li, M., Wang, S. and Gao, X. (2018). DeepSimulator: a deep simulator for Nanopore sequencing. *Bioinformatics*, **34**(17), 2899–2908. doi.org/10.1093/bioinformatics/bty223
- Stöcker, B. K., Köster, J. and Rahmann, S. (2016). SimLoRD: Simulation of Long Read Data. *Bioinformatics*, **32**(17), 2704–2706. doi.org/10.1093/bioinformatics/btw286
- Yang, C., Chu, J., Warren, R. L. and Birol, I. (2017). NanoSim: nanopore sequence read simulator based on statistical characterization. *GigaScience*, **36**(4), 1–6. doi.org/10.1093/gigascience/gix010
- Heller, D. and Vingron, M. (2019). SVIM: structural variant identification using mapped long reads. *Bioinformatics*, **35**(17), 2907–2915. doi.org/10.1093/bioinformatics/btz041
- Cretu Stancu, M., van Roosmalen, M. J., Renkens, I., Nieboer, M. M., Middelkamp, S., de Ligt, J., Pregno, G., Giachino, D., Mandrile, G., Espejo Valle-Inclan, J., Korzelius, J., de Bruijn, E., Cuppen, E., Talkowski, M. E., Marschall, T., de Ridder, J. and Kloosterman, W. P. (2017). Mapping and phasing of structural variation in patient genomes using nanopore sequencing. *Nature communications*, **8**(1), 1326. doi.org/10.1038/s41467-017-01343-4
- Gong, L., Wong, C. H., Cheng, W. C., Tjong, H., Menghi, F., Ngan, C. Y., Liu, E. T. and Wei, C. L. (2018). Picky comprehensively detects high-resolution structural variants in nanopore long reads. *Nature methods*, **15**(6), 455–460. doi.org/10.1038/s41592-018-0002-6
- Tham, C. Y., Tirado-Magallanes, R., Goh, Y., Fullwood, M. J., Koh, B., Wang, W., Ng, C. H., Chng, W. J., Thiery, A., Tenen, D. G. and Benoukraf, T. (2020). NanoVar: accurate characterization of patients’ genomic structural variants using low-depth nanopore sequencing. *Genome biology*, **21**(1), 56. doi.org/10.1186/s13059-020-01968-7
- Li H. (2018). Minimap2: pairwise alignment for nucleotide sequences. *Bioinformatics*, **34**(18), 3094–3100.

## ACKNOWLEDGEMENTS

This project was supported by FWO TBM project T003819N to J.R.V. We thank the Center for Precision Medicine at Sun Yat-sen University for providing the high performance computers. This project was supported by National Key R&D Program of China (2019YFA0904401 to Z.X.)

## AUTHOR CONTRIBUTIONS.

ND conceived, designed and scripted Sim-it and combiSV. ND analyzed the data for the SV caller benchmark. TL ran the simulations and existing SV calling tools for the benchmark. TL and ND designed and executed the SV and long read simulator benchmark. ND wrote the manuscript. JRV and ZX provided guidance and reviewed the manuscript.

*Conflict of interest statement.* None declared.
